# Supplementary material for: SNVMix: predicting single nucleotide variants from next-generation sequencing of tumors
Source: PubMed Central journal article supplement — Bioinformatics. 2010 Feb 3;26(6):730–6. doi: 10.1093/bioinformatics/btq040 (PMC2832826; doi:10.1093/bioinformatics/btq040), 2010-02-03
Supplement: btq040_1.pdf [file btq040_1.pdf]

| <b>Model</b>    | <b>AUC</b>  | <b>TP</b> | <b>FP</b> | <b>TN</b> | <b>FN</b> | <b>SENS</b> | <b>PREC</b> |
|-----------------|-------------|-----------|-----------|-----------|-----------|-------------|-------------|
| 40x_MBmQ50_bQ15 | 0.992823424 | 287       | 71        | 121       | 18        | 0.941       | 0.8017      |
| 40x_MBmQ50_bQ9  | 0.992755046 | 289       | 75        | 117       | 16        | 0.9475      | 0.794       |
| 40x_MBmQ50_bQ14 | 0.992749474 | 286       | 71        | 121       | 19        | 0.9377      | 0.8011      |
| 40x_MBmQ50_bQ13 | 0.992785855 | 287       | 73        | 119       | 18        | 0.941       | 0.7972      |
| 40x_MBmQ50_bQ17 | 0.992859042 | 286       | 72        | 120       | 19        | 0.9377      | 0.7989      |
| 40x_MBmQ50_bQ5  | 0.992860865 | 289       | 76        | 116       | 16        | 0.9475      | 0.7918      |
| 40x_MBmQ50_bQ6  | 0.992848914 | 289       | 76        | 116       | 16        | 0.9475      | 0.7918      |
| 40x_MBmQ50_bQ7  | 0.992855589 | 289       | 76        | 116       | 16        | 0.9475      | 0.7918      |
| 40x_MBmQ50_bQ8  | 0.992809566 | 289       | 76        | 116       | 16        | 0.9475      | 0.7918      |
| 40x_MBmQ50_bQ11 | 0.992777422 | 289       | 76        | 116       | 16        | 0.9475      | 0.7918      |
| 40x_MBmQ45_bQ10 | 0.992794903 | 287       | 74        | 118       | 18        | 0.941       | 0.795       |
| 40x_MBmQ45_bQ11 | 0.992780198 | 287       | 74        | 118       | 18        | 0.941       | 0.795       |
| 40x_MBmQ45_bQ4  | 0.992853512 | 289       | 77        | 115       | 16        | 0.9475      | 0.7896      |
| 40x_MBmQ45_bQ5  | 0.992863132 | 289       | 77        | 115       | 16        | 0.9475      | 0.7896      |
| 40x_MBmQ45_bQ6  | 0.992852071 | 289       | 77        | 115       | 16        | 0.9475      | 0.7896      |
| 40x_MBmQ45_bQ7  | 0.992864191 | 289       | 77        | 115       | 16        | 0.9475      | 0.7896      |
| 40x_MBmQ45_bQ8  | 0.992819631 | 289       | 77        | 115       | 16        | 0.9475      | 0.7896      |
| 40x_MBmQ50_bQ0  | 0.993036691 | 289       | 77        | 115       | 16        | 0.9475      | 0.7896      |
| 40x_MBmQ50_bQ1  | 0.993040124 | 289       | 77        | 115       | 16        | 0.9475      | 0.7896      |
| 40x_MBmQ50_bQ2  | 0.993038535 | 289       | 77        | 115       | 16        | 0.9475      | 0.7896      |
| 40x_MBmQ50_bQ3  | 0.993036691 | 289       | 77        | 115       | 16        | 0.9475      | 0.7896      |
| 40x_MBmQ50_bQ4  | 0.99285116  | 289       | 77        | 115       | 16        | 0.9475      | 0.7896      |
| 40x_MBmQ50_bQ10 | 0.992771722 | 289       | 77        | 115       | 16        | 0.9475      | 0.7896      |
| 40x_MBmQ50_bQ12 | 0.992792911 | 288       | 76        | 116       | 17        | 0.9443      | 0.7912      |
| 40x_MBmQ45_bQ9  | 0.992759072 | 288       | 77        | 115       | 17        | 0.9443      | 0.789       |
| 40x_MBmQ45_bQ13 | 0.992791513 | 285       | 73        | 119       | 20        | 0.9344      | 0.7961      |
| 40x_MBmQ45_bQ14 | 0.992754262 | 284       | 72        | 120       | 21        | 0.9311      | 0.7978      |
| 40x_MBmQ50_bQ16 | 0.992811176 | 283       | 71        | 121       | 22        | 0.9279      | 0.7994      |
| 40x_MBmQ45_bQ1  | 0.993035145 | 289       | 79        | 113       | 16        | 0.9475      | 0.7853      |
| 40x_MBmQ45_bQ2  | 0.993036289 | 289       | 79        | 113       | 16        | 0.9475      | 0.7853      |
| 40x_MBmQ45_bQ3  | 0.993035462 | 289       | 79        | 113       | 16        | 0.9475      | 0.7853      |
| 40x_MBmQ45_bQ12 | 0.992795051 | 284       | 73        | 119       | 21        | 0.9311      | 0.7955      |
| 40x_MBmQ45_bQ15 | 0.992827513 | 284       | 73        | 119       | 21        | 0.9311      | 0.7955      |
| 40x_MBmQ35_bQ3  | 0.992985541 | 289       | 80        | 112       | 16        | 0.9475      | 0.7832      |
| 40x_MBmQ45_bQ0  | 0.993036374 | 289       | 80        | 112       | 16        | 0.9475      | 0.7832      |
| 40x_MBmQ35_bQ13 | 0.992837874 | 287       | 78        | 114       | 18        | 0.941       | 0.7863      |
| 40x_MBmQ50_bQ18 | 0.992911189 | 284       | 74        | 118       | 21        | 0.9311      | 0.7933      |
| 40x_MBmQ35_bQ0  | 0.992983952 | 289       | 81        | 111       | 16        | 0.9475      | 0.7811      |
| 40x_MBmQ35_bQ1  | 0.992984609 | 289       | 81        | 111       | 16        | 0.9475      | 0.7811      |
| 40x_MBmQ35_bQ2  | 0.992983147 | 289       | 81        | 111       | 16        | 0.9475      | 0.7811      |
| 40x_MBmQ35_bQ14 | 0.992799522 | 286       | 77        | 115       | 19        | 0.9377      | 0.7879      |
| 40x_MBmQ35_bQ4  | 0.992889406 | 288       | 80        | 112       | 17        | 0.9443      | 0.7826      |
| 40x_MBmQ35_bQ9  | 0.992870506 | 288       | 80        | 112       | 17        | 0.9443      | 0.7826      |
| 40x_MBmQ40_bQ4  | 0.992864657 | 287       | 79        | 113       | 18        | 0.941       | 0.7842      |
| 40x_MBmQ40_bQ5  | 0.992875464 | 287       | 79        | 113       | 18        | 0.941       | 0.7842      |
| 40x_MBmQ40_bQ6  | 0.992865886 | 287       | 79        | 113       | 18        | 0.941       | 0.7842      |
| 40x_MBmQ40_bQ7  | 0.992787847 | 287       | 79        | 113       | 18        | 0.941       | 0.7842      |
| 40x_MBmQ40_bQ8  | 0.992741295 | 287       | 79        | 113       | 18        | 0.941       | 0.7842      |

|                 |             |     |    |     |    |        |        |
|-----------------|-------------|-----|----|-----|----|--------|--------|
| 40x_MBmQ40_bQ9  | 0.992724577 | 287 | 79 | 113 | 18 | 0.941  | 0.7842 |
| 40x_MBmQ40_bQ14 | 0.992768057 | 284 | 75 | 117 | 21 | 0.9311 | 0.7911 |
| 40x_MBmQ35_bQ15 | 0.992864721 | 286 | 78 | 114 | 19 | 0.9377 | 0.7857 |
| 40x_MBmQ35_bQ5  | 0.992899174 | 288 | 81 | 111 | 17 | 0.9443 | 0.7805 |
| 40x_MBmQ35_bQ6  | 0.992892669 | 288 | 81 | 111 | 17 | 0.9443 | 0.7805 |
| 40x_MBmQ35_bQ7  | 0.992900976 | 288 | 81 | 111 | 17 | 0.9443 | 0.7805 |
| 40x_MBmQ35_bQ12 | 0.992845418 | 285 | 77 | 115 | 20 | 0.9344 | 0.7873 |
| 40x_MBmQ40_bQ10 | 0.992866501 | 285 | 77 | 115 | 20 | 0.9344 | 0.7873 |
| 40x_MBmQ40_bQ11 | 0.992801323 | 285 | 77 | 115 | 20 | 0.9344 | 0.7873 |
| 40x_MBmQ35_bQ10 | 0.99297126  | 287 | 80 | 112 | 18 | 0.941  | 0.782  |
| 40x_MBmQ40_bQ3  | 0.992951511 | 287 | 80 | 112 | 18 | 0.941  | 0.782  |
| 40x_MBmQ40_bQ12 | 0.992820245 | 284 | 76 | 116 | 21 | 0.9311 | 0.7889 |
| 40x_MBmQ40_bQ13 | 0.99281232  | 284 | 76 | 116 | 21 | 0.9311 | 0.7889 |
| 40x_MBmQ40_bQ15 | 0.992843447 | 284 | 76 | 116 | 21 | 0.9311 | 0.7889 |
| 40x_MBmQ35_bQ11 | 0.992830225 | 286 | 79 | 113 | 19 | 0.9377 | 0.7836 |
| 40x_MBmQ45_bQ18 | 0.992833382 | 283 | 75 | 117 | 22 | 0.9279 | 0.7905 |
| 40x_MBmQ50_bQ19 | 0.993090406 | 283 | 75 | 117 | 22 | 0.9279 | 0.7905 |
| 40x_MBmQ50_bQ24 | 0.993331982 | 283 | 75 | 117 | 22 | 0.9279 | 0.7905 |
| 40x_MBmQ30_bQ9  | 0.992848872 | 288 | 82 | 110 | 17 | 0.9443 | 0.7784 |
| 40x_MBmQ30_bQ10 | 0.992947952 | 288 | 82 | 110 | 17 | 0.9443 | 0.7784 |
| 40x_MBmQ35_bQ8  | 0.992854402 | 288 | 82 | 110 | 17 | 0.9443 | 0.7784 |
| 40x_MBmQ40_bQ0  | 0.992951109 | 287 | 81 | 111 | 18 | 0.941  | 0.7799 |
| 40x_MBmQ40_bQ1  | 0.992949159 | 287 | 81 | 111 | 18 | 0.941  | 0.7799 |
| 40x_MBmQ40_bQ2  | 0.992949562 | 287 | 81 | 111 | 18 | 0.941  | 0.7799 |
| 40x_MBmQ45_bQ16 | 0.992730849 | 281 | 73 | 119 | 24 | 0.9213 | 0.7938 |
| 40x_MBmQ45_bQ24 | 0.993269665 | 284 | 77 | 115 | 21 | 0.9311 | 0.7867 |
| 40x_MBmQ30_bQ5  | 0.99288394  | 288 | 83 | 109 | 17 | 0.9443 | 0.7763 |
| 40x_MBmQ30_bQ6  | 0.992876778 | 288 | 83 | 109 | 17 | 0.9443 | 0.7763 |
| 40x_MBmQ30_bQ7  | 0.992888601 | 288 | 83 | 109 | 17 | 0.9443 | 0.7763 |
| 40x_MBmQ30_bQ13 | 0.992818677 | 287 | 82 | 110 | 18 | 0.941  | 0.7778 |
| 40x_MBmQ30_bQ15 | 0.992855822 | 287 | 82 | 110 | 18 | 0.941  | 0.7778 |
| 40x_MBmQ35_bQ16 | 0.992843066 | 284 | 78 | 114 | 21 | 0.9311 | 0.7845 |
| 40x_MBmQ35_bQ17 | 0.99289909  | 284 | 78 | 114 | 21 | 0.9311 | 0.7845 |
| 40x_MBmQ35_bQ18 | 0.992921275 | 284 | 78 | 114 | 21 | 0.9311 | 0.7845 |
| 40x_MBmQ50_bQ23 | 0.993297253 | 281 | 74 | 118 | 24 | 0.9213 | 0.7915 |
| 40x_MBmQ30_bQ11 | 0.992807871 | 286 | 81 | 111 | 19 | 0.9377 | 0.7793 |
| 40x_MBmQ30_bQ14 | 0.992783058 | 286 | 81 | 111 | 19 | 0.9377 | 0.7793 |
| 40x_MBmQ50_bQ20 | 0.993068306 | 280 | 73 | 119 | 25 | 0.918  | 0.7932 |
| 40x_MBmQ40_bQ16 | 0.992822788 | 282 | 76 | 116 | 23 | 0.9246 | 0.7877 |
| 40x_MBmQ40_bQ17 | 0.992877985 | 282 | 76 | 116 | 23 | 0.9246 | 0.7877 |
| 40x_MBmQ45_bQ19 | 0.992948248 | 281 | 75 | 117 | 24 | 0.9213 | 0.7893 |
| 40x_MBmQ50_bQ22 | 0.993207412 | 278 | 71 | 121 | 27 | 0.9115 | 0.7966 |
| 40x_MBmQ30_bQ0  | 0.992969946 | 289 | 86 | 106 | 16 | 0.9475 | 0.7707 |
| 40x_MBmQ30_bQ1  | 0.992969904 | 289 | 86 | 106 | 16 | 0.9475 | 0.7707 |
| 40x_MBmQ30_bQ2  | 0.992970115 | 289 | 86 | 106 | 16 | 0.9475 | 0.7707 |
| 40x_MBmQ30_bQ3  | 0.992971323 | 289 | 86 | 106 | 16 | 0.9475 | 0.7707 |
| 40x_MBmQ45_bQ17 | 0.992780749 | 280 | 74 | 118 | 25 | 0.918  | 0.791  |
| 40x_MBmQ45_bQ22 | 0.993226969 | 280 | 74 | 118 | 25 | 0.918  | 0.791  |
| 40x_MBmQ30_bQ4  | 0.992873769 | 288 | 85 | 107 | 17 | 0.9443 | 0.7721 |

|                 |             |     |    |     |    |        |        |
|-----------------|-------------|-----|----|-----|----|--------|--------|
| 40x_MBmQ30_bQ8  | 0.992840099 | 288 | 85 | 107 | 17 | 0.9443 | 0.7721 |
| 40x_MBmQ30_bQ12 | 0.992825797 | 285 | 81 | 111 | 20 | 0.9344 | 0.7787 |
| 40x_MBmQ30_bQ16 | 0.992825691 | 285 | 81 | 111 | 20 | 0.9344 | 0.7787 |
| 40x_MBmQ40_bQ18 | 0.992777803 | 282 | 77 | 115 | 23 | 0.9246 | 0.7855 |
| 40x_MBmQ30_bQ17 | 0.992881185 | 285 | 82 | 110 | 20 | 0.9344 | 0.7766 |
| 40x_MBmQ30_bQ18 | 0.992905913 | 285 | 82 | 110 | 20 | 0.9344 | 0.7766 |
| 40x_MBmQ35_bQ19 | 0.993018024 | 284 | 81 | 111 | 21 | 0.9311 | 0.7781 |
| 40x_MBmQ45_bQ20 | 0.992992173 | 278 | 73 | 119 | 27 | 0.9115 | 0.792  |
| 40x_MBmQ45_bQ23 | 0.993239598 | 279 | 75 | 117 | 26 | 0.9148 | 0.7881 |
| 40x_MBmQ30_bQ19 | 0.99299978  | 286 | 85 | 107 | 19 | 0.9377 | 0.7709 |
| 40x_MBmQ40_bQ19 | 0.992897967 | 282 | 81 | 111 | 23 | 0.9246 | 0.7769 |
| 40x_MBmQ50_bQ21 | 0.993278798 | 276 | 73 | 119 | 29 | 0.9049 | 0.7908 |
| 40x_MBmQ35_bQ20 | 0.993004336 | 280 | 80 | 112 | 25 | 0.918  | 0.7778 |
| 40x_MBmQ40_bQ21 | 0.993158105 | 277 | 76 | 116 | 28 | 0.9082 | 0.7847 |
| 40x_MBmQ35_bQ21 | 0.993207751 | 278 | 78 | 114 | 27 | 0.9115 | 0.7809 |
| 40x_MBmQ40_bQ22 | 0.993189782 | 278 | 78 | 114 | 27 | 0.9115 | 0.7809 |
| 40x_MBmQ40_bQ24 | 0.993338487 | 276 | 76 | 116 | 29 | 0.9049 | 0.7841 |
| 40x_MBmQ40_bQ20 | 0.993019338 | 278 | 79 | 113 | 27 | 0.9115 | 0.7787 |
| 40x_MBmQ35_bQ24 | 0.993318294 | 275 | 75 | 117 | 30 | 0.9016 | 0.7857 |
| 40x_MBmQ45_bQ21 | 0.993114964 | 274 | 74 | 118 | 31 | 0.8984 | 0.7874 |
| 40x_MBmQ40_bQ23 | 0.993290833 | 276 | 77 | 115 | 29 | 0.9049 | 0.7819 |
| 40x_MBmQ35_bQ22 | 0.993211141 | 278 | 80 | 112 | 27 | 0.9115 | 0.7765 |
| 40x_MBmQ30_bQ20 | 0.99298749  | 281 | 85 | 107 | 24 | 0.9213 | 0.7678 |
| 40x_MBmQ35_bQ23 | 0.993329334 | 276 | 78 | 114 | 29 | 0.9049 | 0.7797 |
| 40x_MBmQ50_bQ25 | 0.993146536 | 273 | 74 | 118 | 32 | 0.8951 | 0.7867 |
| 40x_MBmQ30_bQ21 | 0.993237818 | 279 | 84 | 108 | 26 | 0.9148 | 0.7686 |
| 40x_MBmQ45_bQ25 | 0.993169822 | 272 | 75 | 117 | 33 | 0.8918 | 0.7839 |
| 40x_MBmQ30_bQ22 | 0.993121787 | 279 | 85 | 107 | 26 | 0.9148 | 0.7665 |
| 40x_MBmQ30_bQ24 | 0.993226312 | 276 | 82 | 110 | 29 | 0.9049 | 0.7709 |
| 40x_MBmQ30_bQ23 | 0.993321917 | 277 | 84 | 108 | 28 | 0.9082 | 0.7673 |
| 40x_MBmQ40_bQ25 | 0.993152151 | 272 | 78 | 114 | 33 | 0.8918 | 0.7771 |
| 40x_MBmQ35_bQ25 | 0.993167576 | 271 | 79 | 113 | 34 | 0.8885 | 0.7743 |
| 40x_MBmQ30_bQ25 | 0.993232436 | 272 | 82 | 110 | 33 | 0.8918 | 0.7684 |
| 40x_MBmQ50_bQ26 | 0.992860377 | 257 | 64 | 128 | 48 | 0.8426 | 0.8006 |
| 40x_MBmQ35_bQ26 | 0.992930322 | 256 | 66 | 126 | 49 | 0.8393 | 0.795  |
| 40x_MBmQ40_bQ26 | 0.992903137 | 255 | 66 | 126 | 50 | 0.8361 | 0.7944 |
| 40x_MBmQ30_bQ26 | 0.992903243 | 257 | 69 | 123 | 48 | 0.8426 | 0.7883 |
| 40x_MBmQ45_bQ26 | 0.992878791 | 253 | 64 | 128 | 52 | 0.8295 | 0.7981 |
| 40x_MBmQ35_bQ27 | 0.992892479 | 249 | 66 | 126 | 56 | 0.8164 | 0.7905 |
| 40x_MBmQ40_bQ27 | 0.99285044  | 249 | 66 | 126 | 56 | 0.8164 | 0.7905 |
| 40x_MBmQ50_bQ27 | 0.992838553 | 247 | 63 | 129 | 58 | 0.8098 | 0.7968 |
| 40x_MBmQ45_bQ27 | 0.992829293 | 247 | 64 | 128 | 58 | 0.8098 | 0.7942 |
| 40x_MBmQ30_bQ27 | 0.992892563 | 249 | 70 | 122 | 56 | 0.8164 | 0.7806 |
| 40x_MBmQ50_bQ28 | 0.992645287 | 242 | 64 | 128 | 63 | 0.7934 | 0.7908 |
| 40x_MBmQ40_bQ28 | 0.992647618 | 242 | 67 | 125 | 63 | 0.7934 | 0.7832 |
| 40x_MBmQ45_bQ28 | 0.992651051 | 238 | 66 | 126 | 67 | 0.7803 | 0.7829 |
| 40x_MBmQ35_bQ28 | 0.992688598 | 236 | 66 | 126 | 69 | 0.7738 | 0.7815 |
| 40x_MBmQ30_bQ28 | 0.99269042  | 236 | 69 | 123 | 69 | 0.7738 | 0.7738 |
| 40x_MBmQ35_bQ30 | 0.992087655 | 228 | 61 | 131 | 77 | 0.7475 | 0.7889 |

|                 |             |     |     |     |     |        |        |
|-----------------|-------------|-----|-----|-----|-----|--------|--------|
| 40x_MBmQ40_bQ29 | 0.992523747 | 228 | 61  | 131 | 77  | 0.7475 | 0.7889 |
| 40x_MBmQ45_bQ29 | 0.992537053 | 228 | 61  | 131 | 77  | 0.7475 | 0.7889 |
| 40x_MBmQ50_bQ30 | 0.991982239 | 226 | 58  | 134 | 79  | 0.741  | 0.7958 |
| 40x_MBmQ45_bQ30 | 0.992080662 | 227 | 60  | 132 | 78  | 0.7443 | 0.7909 |
| 40x_MBmQ35_bQ29 | 0.992561548 | 228 | 62  | 130 | 77  | 0.7475 | 0.7862 |
| 40x_MBmQ40_bQ30 | 0.992065131 | 227 | 61  | 131 | 78  | 0.7443 | 0.7882 |
| 40x_MBmQ50_bQ29 | 0.99251633  | 225 | 59  | 133 | 80  | 0.7377 | 0.7923 |
| 40x_MBmQ30_bQ30 | 0.992082039 | 228 | 64  | 128 | 77  | 0.7475 | 0.7808 |
| 40x_MBmQ30_bQ29 | 0.992554683 | 228 | 66  | 126 | 77  | 0.7475 | 0.7755 |
| 10x_MBmQ30_bQ0  | 0.990584174 | 294 | 110 | 82  | 11  | 0.9639 | 0.7277 |
| 10x_MBmQ30_bQ1  | 0.990561163 | 294 | 110 | 82  | 11  | 0.9639 | 0.7277 |
| 10x_MBmQ30_bQ2  | 0.990562201 | 294 | 110 | 82  | 11  | 0.9639 | 0.7277 |
| 10x_MBmQ30_bQ3  | 0.990564595 | 294 | 110 | 82  | 11  | 0.9639 | 0.7277 |
| 10x_MBmQ30_bQ4  | 0.990558323 | 294 | 110 | 82  | 11  | 0.9639 | 0.7277 |
| 10x_MBmQ30_bQ5  | 0.990600151 | 294 | 110 | 82  | 11  | 0.9639 | 0.7277 |
| 10x_MBmQ30_bQ6  | 0.990648885 | 294 | 110 | 82  | 11  | 0.9639 | 0.7277 |
| 10x_MBmQ30_bQ7  | 0.990601464 | 294 | 110 | 82  | 11  | 0.9639 | 0.7277 |
| 10x_MBmQ30_bQ8  | 0.990601062 | 294 | 110 | 82  | 11  | 0.9639 | 0.7277 |
| 10x_MBmQ30_bQ9  | 0.990579131 | 294 | 110 | 82  | 11  | 0.9639 | 0.7277 |
| 10x_MBmQ30_bQ10 | 0.990078942 | 295 | 114 | 78  | 10  | 0.9672 | 0.7213 |
| 10x_MBmQ30_bQ11 | 0.989999992 | 295 | 115 | 77  | 10  | 0.9672 | 0.7195 |
| 10x_MBmQ30_bQ12 | 0.990041967 | 295 | 114 | 78  | 10  | 0.9672 | 0.7213 |
| 10x_MBmQ30_bQ13 | 0.989888919 | 294 | 115 | 77  | 11  | 0.9639 | 0.7188 |
| 10x_MBmQ30_bQ14 | 0.98980145  | 294 | 116 | 76  | 11  | 0.9639 | 0.7171 |
| 10x_MBmQ30_bQ15 | 0.98977151  | 294 | 115 | 77  | 11  | 0.9639 | 0.7188 |
| 10x_MBmQ30_bQ16 | 0.989793631 | 292 | 115 | 77  | 13  | 0.9574 | 0.7174 |
| 10x_MBmQ30_bQ17 | 0.989515101 | 293 | 115 | 77  | 12  | 0.9607 | 0.7181 |
| 10x_MBmQ30_bQ18 | 0.989446364 | 296 | 119 | 73  | 9   | 0.9705 | 0.7133 |
| 10x_MBmQ30_bQ19 | 0.989408647 | 297 | 127 | 65  | 8   | 0.9738 | 0.7005 |
| 10x_MBmQ30_bQ20 | 0.989448695 | 293 | 110 | 82  | 12  | 0.9607 | 0.727  |
| 10x_MBmQ30_bQ21 | 0.988886252 | 288 | 100 | 92  | 17  | 0.9443 | 0.7423 |
| 10x_MBmQ30_bQ22 | 0.988172732 | 285 | 98  | 94  | 20  | 0.9344 | 0.7441 |
| 10x_MBmQ30_bQ23 | 0.987791816 | 282 | 97  | 95  | 23  | 0.9246 | 0.7441 |
| 10x_MBmQ30_bQ24 | 0.987539984 | 280 | 96  | 96  | 25  | 0.918  | 0.7447 |
| 10x_MBmQ30_bQ25 | 0.982355635 | 261 | 89  | 103 | 44  | 0.8557 | 0.7457 |
| 10x_MBmQ30_bQ26 | 0.506345107 | 0   | 0   | 192 | 305 | 0      | NaN    |
| 10x_MBmQ30_bQ27 | 0.505833667 | 0   | 0   | 192 | 305 | 0      | NaN    |
| 10x_MBmQ30_bQ28 | 0.505833667 | 0   | 0   | 192 | 305 | 0      | NaN    |
| 10x_MBmQ30_bQ29 | 0.505833667 | 0   | 0   | 192 | 305 | 0      | NaN    |
| 10x_MBmQ30_bQ30 | 0.505833667 | 0   | 0   | 192 | 305 | 0      | NaN    |
| 10x_MBmQ35_bQ0  | 0.99058036  | 295 | 108 | 84  | 10  | 0.9672 | 0.732  |
| 10x_MBmQ35_bQ1  | 0.990578432 | 295 | 108 | 84  | 10  | 0.9672 | 0.732  |
| 10x_MBmQ35_bQ2  | 0.990572986 | 295 | 108 | 84  | 10  | 0.9672 | 0.732  |
| 10x_MBmQ35_bQ3  | 0.990579788 | 295 | 108 | 84  | 10  | 0.9672 | 0.732  |
| 10x_MBmQ35_bQ4  | 0.990594175 | 295 | 108 | 84  | 10  | 0.9672 | 0.732  |
| 10x_MBmQ35_bQ5  | 0.990631934 | 295 | 108 | 84  | 10  | 0.9672 | 0.732  |
| 10x_MBmQ35_bQ6  | 0.990636829 | 295 | 108 | 84  | 10  | 0.9672 | 0.732  |
| 10x_MBmQ35_bQ7  | 0.990654543 | 295 | 108 | 84  | 10  | 0.9672 | 0.732  |
| 10x_MBmQ35_bQ8  | 0.990628565 | 295 | 108 | 84  | 10  | 0.9672 | 0.732  |

|                 |             |     |     |     |     |        |        |
|-----------------|-------------|-----|-----|-----|-----|--------|--------|
| 10x_MBmQ35_bQ9  | 0.990621128 | 295 | 108 | 84  | 10  | 0.9672 | 0.732  |
| 10x_MBmQ35_bQ10 | 0.990055676 | 295 | 112 | 80  | 10  | 0.9672 | 0.7248 |
| 10x_MBmQ35_bQ11 | 0.990004526 | 295 | 112 | 80  | 10  | 0.9672 | 0.7248 |
| 10x_MBmQ35_bQ12 | 0.99006002  | 292 | 108 | 84  | 13  | 0.9574 | 0.73   |
| 10x_MBmQ35_bQ13 | 0.989908031 | 291 | 108 | 84  | 14  | 0.9541 | 0.7293 |
| 10x_MBmQ35_bQ14 | 0.989882625 | 294 | 114 | 78  | 11  | 0.9639 | 0.7206 |
| 10x_MBmQ35_bQ15 | 0.989865801 | 294 | 113 | 79  | 11  | 0.9639 | 0.7224 |
| 10x_MBmQ35_bQ16 | 0.989672748 | 292 | 113 | 79  | 13  | 0.9574 | 0.721  |
| 10x_MBmQ35_bQ17 | 0.989591276 | 293 | 113 | 79  | 12  | 0.9607 | 0.7217 |
| 10x_MBmQ35_bQ18 | 0.989372117 | 295 | 117 | 75  | 10  | 0.9672 | 0.716  |
| 10x_MBmQ35_bQ19 | 0.989450368 | 297 | 123 | 69  | 8   | 0.9738 | 0.7071 |
| 10x_MBmQ35_bQ20 | 0.98938784  | 292 | 108 | 84  | 13  | 0.9574 | 0.73   |
| 10x_MBmQ35_bQ21 | 0.988813298 | 287 | 99  | 93  | 18  | 0.941  | 0.7435 |
| 10x_MBmQ35_bQ22 | 0.988130671 | 285 | 97  | 95  | 20  | 0.9344 | 0.7461 |
| 10x_MBmQ35_bQ23 | 0.9877395   | 282 | 96  | 96  | 23  | 0.9246 | 0.746  |
| 10x_MBmQ35_bQ24 | 0.987569458 | 280 | 95  | 97  | 25  | 0.918  | 0.7467 |
| 10x_MBmQ35_bQ25 | 0.982271175 | 260 | 89  | 103 | 45  | 0.8525 | 0.745  |
| 10x_MBmQ35_bQ26 | 0.506345107 | 0   | 0   | 192 | 305 | 0      | NaN    |
| 10x_MBmQ35_bQ27 | 0.505833667 | 0   | 0   | 192 | 305 | 0      | NaN    |
| 10x_MBmQ35_bQ28 | 0.505833667 | 0   | 0   | 192 | 305 | 0      | NaN    |
| 10x_MBmQ35_bQ29 | 0.505833667 | 0   | 0   | 192 | 305 | 0      | NaN    |
| 10x_MBmQ35_bQ30 | 0.505833667 | 0   | 0   | 192 | 305 | 0      | NaN    |
| 10x_MBmQ40_bQ0  | 0.990583877 | 292 | 103 | 89  | 13  | 0.9574 | 0.7392 |
| 10x_MBmQ40_bQ1  | 0.990614453 | 292 | 103 | 89  | 13  | 0.9574 | 0.7392 |
| 10x_MBmQ40_bQ2  | 0.990635303 | 292 | 103 | 89  | 13  | 0.9574 | 0.7392 |
| 10x_MBmQ40_bQ3  | 0.990597544 | 292 | 103 | 89  | 13  | 0.9574 | 0.7392 |
| 10x_MBmQ40_bQ4  | 0.990616932 | 292 | 103 | 89  | 13  | 0.9574 | 0.7392 |
| 10x_MBmQ40_bQ5  | 0.990633206 | 292 | 104 | 88  | 13  | 0.9574 | 0.7374 |
| 10x_MBmQ40_bQ6  | 0.990708215 | 292 | 104 | 88  | 13  | 0.9574 | 0.7374 |
| 10x_MBmQ40_bQ7  | 0.990640283 | 292 | 104 | 88  | 13  | 0.9574 | 0.7374 |
| 10x_MBmQ40_bQ8  | 0.990630451 | 292 | 104 | 88  | 13  | 0.9574 | 0.7374 |
| 10x_MBmQ40_bQ9  | 0.990606105 | 292 | 104 | 88  | 13  | 0.9574 | 0.7374 |
| 10x_MBmQ40_bQ10 | 0.990044361 | 292 | 110 | 82  | 13  | 0.9574 | 0.7264 |
| 10x_MBmQ40_bQ11 | 0.990019104 | 292 | 111 | 81  | 13  | 0.9574 | 0.7246 |
| 10x_MBmQ40_bQ12 | 0.989982871 | 292 | 111 | 81  | 13  | 0.9574 | 0.7246 |
| 10x_MBmQ40_bQ13 | 0.989887541 | 292 | 112 | 80  | 13  | 0.9574 | 0.7228 |
| 10x_MBmQ40_bQ14 | 0.989820944 | 292 | 112 | 80  | 13  | 0.9574 | 0.7228 |
| 10x_MBmQ40_bQ15 | 0.989796683 | 292 | 112 | 80  | 13  | 0.9574 | 0.7228 |
| 10x_MBmQ40_bQ16 | 0.989679189 | 290 | 111 | 81  | 15  | 0.9508 | 0.7232 |
| 10x_MBmQ40_bQ17 | 0.989504655 | 292 | 113 | 79  | 13  | 0.9574 | 0.721  |
| 10x_MBmQ40_bQ18 | 0.989336562 | 295 | 118 | 74  | 10  | 0.9672 | 0.7143 |
| 10x_MBmQ40_bQ19 | 0.989353619 | 295 | 124 | 68  | 10  | 0.9672 | 0.7041 |
| 10x_MBmQ40_bQ20 | 0.989220531 | 292 | 107 | 85  | 13  | 0.9574 | 0.7318 |
| 10x_MBmQ40_bQ21 | 0.988752401 | 287 | 96  | 96  | 18  | 0.941  | 0.7493 |
| 10x_MBmQ40_bQ22 | 0.987939249 | 284 | 94  | 98  | 21  | 0.9311 | 0.7513 |
| 10x_MBmQ40_bQ23 | 0.987695851 | 282 | 93  | 99  | 23  | 0.9246 | 0.752  |
| 10x_MBmQ40_bQ24 | 0.987471056 | 281 | 93  | 99  | 24  | 0.9213 | 0.7513 |
| 10x_MBmQ40_bQ25 | 0.981773423 | 259 | 86  | 106 | 46  | 0.8492 | 0.7507 |
| 10x_MBmQ40_bQ26 | 0.506345107 | 0   | 0   | 192 | 305 | 0      | NaN    |

|                 |             |     |     |     |     |        |        |
|-----------------|-------------|-----|-----|-----|-----|--------|--------|
| 10x_MBmQ40_bQ27 | 0.505833667 | 0   | 0   | 192 | 305 | 0      | NaN    |
| 10x_MBmQ40_bQ28 | 0.505833667 | 0   | 0   | 192 | 305 | 0      | NaN    |
| 10x_MBmQ40_bQ29 | 0.505833667 | 0   | 0   | 192 | 305 | 0      | NaN    |
| 10x_MBmQ40_bQ30 | 0.505833667 | 0   | 0   | 192 | 305 | 0      | NaN    |
| 10x_MBmQ45_bQ0  | 0.990005564 | 286 | 89  | 103 | 19  | 0.9377 | 0.7627 |
| 10x_MBmQ45_bQ1  | 0.990001475 | 286 | 89  | 103 | 19  | 0.9377 | 0.7627 |
| 10x_MBmQ45_bQ2  | 0.989983146 | 286 | 89  | 103 | 19  | 0.9377 | 0.7627 |
| 10x_MBmQ45_bQ3  | 0.989989821 | 286 | 89  | 103 | 19  | 0.9377 | 0.7627 |
| 10x_MBmQ45_bQ4  | 0.990003933 | 286 | 89  | 103 | 19  | 0.9377 | 0.7627 |
| 10x_MBmQ45_bQ5  | 0.990058113 | 287 | 89  | 103 | 18  | 0.941  | 0.7633 |
| 10x_MBmQ45_bQ6  | 0.990038471 | 287 | 89  | 103 | 18  | 0.941  | 0.7633 |
| 10x_MBmQ45_bQ7  | 0.990036458 | 286 | 89  | 103 | 19  | 0.9377 | 0.7627 |
| 10x_MBmQ45_bQ8  | 0.990056418 | 286 | 90  | 102 | 19  | 0.9377 | 0.7606 |
| 10x_MBmQ45_bQ9  | 0.990051333 | 286 | 90  | 102 | 19  | 0.9377 | 0.7606 |
| 10x_MBmQ45_bQ10 | 0.989403456 | 285 | 97  | 95  | 20  | 0.9344 | 0.7461 |
| 10x_MBmQ45_bQ11 | 0.989382924 | 285 | 97  | 95  | 20  | 0.9344 | 0.7461 |
| 10x_MBmQ45_bQ12 | 0.989368558 | 285 | 97  | 95  | 20  | 0.9344 | 0.7461 |
| 10x_MBmQ45_bQ13 | 0.98930249  | 285 | 97  | 95  | 20  | 0.9344 | 0.7461 |
| 10x_MBmQ45_bQ14 | 0.989267909 | 290 | 100 | 92  | 15  | 0.9508 | 0.7436 |
| 10x_MBmQ45_bQ15 | 0.989263968 | 290 | 101 | 91  | 15  | 0.9508 | 0.7417 |
| 10x_MBmQ45_bQ16 | 0.989101152 | 290 | 96  | 96  | 15  | 0.9508 | 0.7513 |
| 10x_MBmQ45_bQ17 | 0.988854744 | 290 | 97  | 95  | 15  | 0.9508 | 0.7494 |
| 10x_MBmQ45_bQ18 | 0.988734899 | 290 | 101 | 91  | 15  | 0.9508 | 0.7417 |
| 10x_MBmQ45_bQ19 | 0.98851769  | 290 | 101 | 91  | 15  | 0.9508 | 0.7417 |
| 10x_MBmQ45_bQ20 | 0.98823793  | 287 | 90  | 102 | 18  | 0.941  | 0.7613 |
| 10x_MBmQ45_bQ21 | 0.987641162 | 281 | 81  | 111 | 24  | 0.9213 | 0.7762 |
| 10x_MBmQ45_bQ22 | 0.986892488 | 276 | 80  | 112 | 29  | 0.9049 | 0.7753 |
| 10x_MBmQ45_bQ23 | 0.986548993 | 276 | 80  | 112 | 29  | 0.9049 | 0.7753 |
| 10x_MBmQ45_bQ24 | 0.986278366 | 274 | 80  | 112 | 31  | 0.8984 | 0.774  |
| 10x_MBmQ45_bQ25 | 0.980128135 | 251 | 78  | 114 | 54  | 0.823  | 0.7629 |
| 10x_MBmQ45_bQ26 | 0.506345107 | 0   | 0   | 192 | 305 | 0      | NaN    |
| 10x_MBmQ45_bQ27 | 0.505833667 | 0   | 0   | 192 | 305 | 0      | NaN    |
| 10x_MBmQ45_bQ28 | 0.505833667 | 0   | 0   | 192 | 305 | 0      | NaN    |
| 10x_MBmQ45_bQ29 | 0.505833667 | 0   | 0   | 192 | 305 | 0      | NaN    |
| 10x_MBmQ45_bQ30 | 0.505833667 | 0   | 0   | 192 | 305 | 0      | NaN    |
| 10x_MBmQ50_bQ0  | 0.989950324 | 286 | 87  | 105 | 19  | 0.9377 | 0.7668 |
| 10x_MBmQ50_bQ1  | 0.989962254 | 286 | 87  | 105 | 19  | 0.9377 | 0.7668 |
| 10x_MBmQ50_bQ2  | 0.989945557 | 286 | 87  | 105 | 19  | 0.9377 | 0.7668 |
| 10x_MBmQ50_bQ3  | 0.989948905 | 286 | 87  | 105 | 19  | 0.9377 | 0.7668 |
| 10x_MBmQ50_bQ4  | 0.989963737 | 286 | 87  | 105 | 19  | 0.9377 | 0.7668 |
| 10x_MBmQ50_bQ5  | 0.989983867 | 286 | 87  | 105 | 19  | 0.9377 | 0.7668 |
| 10x_MBmQ50_bQ6  | 0.989988867 | 286 | 87  | 105 | 19  | 0.9377 | 0.7668 |
| 10x_MBmQ50_bQ7  | 0.989986494 | 286 | 88  | 104 | 19  | 0.9377 | 0.7647 |
| 10x_MBmQ50_bQ8  | 0.990004187 | 286 | 89  | 103 | 19  | 0.9377 | 0.7627 |
| 10x_MBmQ50_bQ9  | 0.989980243 | 286 | 89  | 103 | 19  | 0.9377 | 0.7627 |
| 10x_MBmQ50_bQ10 | 0.989388263 | 285 | 94  | 98  | 20  | 0.9344 | 0.752  |
| 10x_MBmQ50_bQ11 | 0.989332875 | 288 | 95  | 97  | 17  | 0.9443 | 0.752  |
| 10x_MBmQ50_bQ12 | 0.989346288 | 288 | 95  | 97  | 17  | 0.9443 | 0.752  |
| 10x_MBmQ50_bQ13 | 0.989192752 | 289 | 96  | 96  | 16  | 0.9475 | 0.7506 |

|                 |             |     |     |     |     |        |        |
|-----------------|-------------|-----|-----|-----|-----|--------|--------|
| 10x_MBmQ50_bQ14 | 0.989215848 | 290 | 99  | 93  | 15  | 0.9508 | 0.7455 |
| 10x_MBmQ50_bQ15 | 0.989151793 | 290 | 99  | 93  | 15  | 0.9508 | 0.7455 |
| 10x_MBmQ50_bQ16 | 0.989045785 | 290 | 94  | 98  | 15  | 0.9508 | 0.7552 |
| 10x_MBmQ50_bQ17 | 0.98873778  | 290 | 95  | 97  | 15  | 0.9508 | 0.7532 |
| 10x_MBmQ50_bQ18 | 0.988667115 | 290 | 99  | 93  | 15  | 0.9508 | 0.7455 |
| 10x_MBmQ50_bQ19 | 0.988432509 | 290 | 99  | 93  | 15  | 0.9508 | 0.7455 |
| 10x_MBmQ50_bQ20 | 0.988190636 | 287 | 88  | 104 | 18  | 0.941  | 0.7653 |
| 10x_MBmQ50_bQ21 | 0.987587214 | 281 | 80  | 112 | 24  | 0.9213 | 0.7784 |
| 10x_MBmQ50_bQ22 | 0.986819026 | 279 | 79  | 113 | 26  | 0.9148 | 0.7793 |
| 10x_MBmQ50_bQ23 | 0.986425566 | 277 | 80  | 112 | 28  | 0.9082 | 0.7759 |
| 10x_MBmQ50_bQ24 | 0.986080269 | 275 | 80  | 112 | 30  | 0.9016 | 0.7746 |
| 10x_MBmQ50_bQ25 | 0.979832017 | 251 | 75  | 117 | 54  | 0.823  | 0.7699 |
| 10x_MBmQ50_bQ26 | 0.506345107 | 0   | 0   | 192 | 305 | 0      | NaN    |
| 10x_MBmQ50_bQ27 | 0.505833667 | 0   | 0   | 192 | 305 | 0      | NaN    |
| 10x_MBmQ50_bQ28 | 0.505833667 | 0   | 0   | 192 | 305 | 0      | NaN    |
| 10x_MBmQ50_bQ29 | 0.505833667 | 0   | 0   | 192 | 305 | 0      | NaN    |
| 10x_MBmQ50_bQ30 | 0.505833667 | 0   | 0   | 192 | 305 | 0      | NaN    |
| 40x_MQ0         | 0.992863725 | 291 | 107 | 85  | 14  | 0.9541 | 0.7312 |
| 40x_MQ5         | 0.992857792 | 291 | 107 | 85  | 14  | 0.9541 | 0.7312 |
| 40x_MQ10        | 0.992829314 | 291 | 106 | 86  | 14  | 0.9541 | 0.733  |
| 40x_MQ20        | 0.992752122 | 291 | 104 | 88  | 14  | 0.9541 | 0.7367 |
| 40x_MQ30        | 0.992969734 | 289 | 86  | 106 | 16  | 0.9475 | 0.7707 |
| 40x_MQ40        | 0.992949202 | 287 | 81  | 111 | 18  | 0.941  | 0.7799 |
| 40x_MbQ0        | 0.992856182 | 290 | 107 | 85  | 15  | 0.9508 | 0.7305 |
| 40x_MbQ5        | 0.992855059 | 290 | 107 | 85  | 15  | 0.9508 | 0.7305 |
| 40x_MbQ10       | 0.992831518 | 290 | 106 | 86  | 15  | 0.9508 | 0.7323 |
| 40x_MbQ20       | 0.992753987 | 291 | 104 | 88  | 14  | 0.9541 | 0.7367 |
| 40x_MbQ30       | 0.992969734 | 289 | 86  | 106 | 16  | 0.9475 | 0.7707 |
| 40x_MbQ40       | 0.99294863  | 287 | 81  | 111 | 18  | 0.941  | 0.7799 |
| 40x_bQ0         | 0.992856542 | 291 | 107 | 85  | 14  | 0.9541 | 0.7312 |
| 40x_bQ5         | 0.992775939 | 290 | 104 | 88  | 15  | 0.9508 | 0.736  |
| 40x_bQ10        | 0.992625941 | 291 | 103 | 89  | 14  | 0.9541 | 0.7386 |
| 40x_bQ20        | 0.993038238 | 282 | 104 | 88  | 23  | 0.9246 | 0.7306 |
| 40x_bQ30        | 0.992125752 | 226 | 71  | 121 | 79  | 0.741  | 0.7609 |
| 40x_bQ40        | 0.505833667 | 0   | 0   | 192 | 305 | 0      | NaN    |
| 40x_mQ0         | 0.99208935  | 290 | 107 | 85  | 15  | 0.9508 | 0.7305 |
| 40x_mQ5         | 0.992089964 | 289 | 107 | 85  | 16  | 0.9475 | 0.7298 |
| 40x_mQ10        | 0.992066826 | 289 | 105 | 87  | 16  | 0.9475 | 0.7335 |
| 40x_mQ20        | 0.99217044  | 288 | 105 | 87  | 17  | 0.9443 | 0.7328 |
| 40x_mQ30        | 0.992335588 | 288 | 84  | 108 | 17  | 0.9443 | 0.7742 |
| 40x_mQ40        | 0.992212161 | 287 | 81  | 111 | 18  | 0.941  | 0.7799 |
| 40x_mbQ0        | 0.992857114 | 290 | 107 | 85  | 15  | 0.9508 | 0.7305 |
| 40x_mbQ5        | 0.992621513 | 290 | 104 | 88  | 15  | 0.9508 | 0.736  |
| 40x_mbQ10       | 0.992516225 | 291 | 104 | 88  | 14  | 0.9541 | 0.7367 |
| 40x_mbQ20       | 0.992891779 | 282 | 100 | 92  | 23  | 0.9246 | 0.7382 |
| 40x_mbQ30       | 0.992082039 | 228 | 64  | 128 | 77  | 0.7475 | 0.7808 |
| 40x_mbQ40       | 0.505833667 | 0   | 0   | 192 | 305 | 0      | NaN    |
| 10x_MQ0         | 0.990474669 | 299 | 163 | 29  | 6   | 0.9803 | 0.6472 |
| 10x_MQ5         | 0.990438266 | 299 | 162 | 30  | 6   | 0.9803 | 0.6486 |

|           |             |     |     |     |     |        |        |
|-----------|-------------|-----|-----|-----|-----|--------|--------|
| 10x_MQ10  | 0.990385188 | 299 | 162 | 30  | 6   | 0.9803 | 0.6486 |
| 10x_MQ20  | 0.99047344  | 297 | 152 | 40  | 8   | 0.9738 | 0.6615 |
| 10x_MQ30  | 0.990546648 | 290 | 108 | 84  | 15  | 0.9508 | 0.7286 |
| 10x_MQ40  | 0.990580911 | 292 | 103 | 89  | 13  | 0.9574 | 0.7392 |
| 10x_MbQ0  | 0.990514441 | 299 | 160 | 32  | 6   | 0.9803 | 0.6514 |
| 10x_MbQ5  | 0.99052031  | 299 | 160 | 32  | 6   | 0.9803 | 0.6514 |
| 10x_MbQ10 | 0.990417925 | 299 | 159 | 33  | 6   | 0.9803 | 0.6528 |
| 10x_MbQ20 | 0.990468079 | 298 | 150 | 42  | 7   | 0.977  | 0.6652 |
| 10x_MbQ30 | 0.990568176 | 290 | 108 | 84  | 15  | 0.9508 | 0.7286 |
| 10x_MbQ40 | 0.990619772 | 292 | 103 | 89  | 13  | 0.9574 | 0.7392 |
| 10x_bQ0   | 0.990542241 | 299 | 162 | 30  | 6   | 0.9803 | 0.6486 |
| 10x_bQ5   | 0.990576165 | 299 | 160 | 32  | 6   | 0.9803 | 0.6514 |
| 10x_bQ10  | 0.990018468 | 301 | 159 | 33  | 4   | 0.9869 | 0.6543 |
| 10x_bQ20  | 0.98913783  | 302 | 166 | 26  | 3   | 0.9902 | 0.6453 |
| 10x_bQ30  | 0.505833667 | 0   | 0   | 192 | 305 | 0      | NaN    |
| 10x_bQ40  | 0.505833667 | 0   | 0   | 192 | 305 | 0      | NaN    |
| 10x_mQ0   | 0.989918223 | 292 | 151 | 41  | 13  | 0.9574 | 0.6591 |
| 10x_mQ5   | 0.989950324 | 292 | 151 | 41  | 13  | 0.9574 | 0.6591 |
| 10x_mQ10  | 0.989912926 | 292 | 149 | 43  | 13  | 0.9574 | 0.6621 |
| 10x_mQ20  | 0.990061546 | 291 | 141 | 51  | 14  | 0.9541 | 0.6736 |
| 10x_mQ30  | 0.990069576 | 283 | 103 | 89  | 22  | 0.9279 | 0.7332 |
| 10x_mQ40  | 0.99012382  | 280 | 94  | 98  | 25  | 0.918  | 0.7487 |
| 10x_mbQ0  | 0.990539698 | 299 | 162 | 30  | 6   | 0.9803 | 0.6486 |
| 10x_mbQ5  | 0.99058428  | 299 | 160 | 32  | 6   | 0.9803 | 0.6514 |
| 10x_mbQ10 | 0.989940281 | 301 | 161 | 31  | 4   | 0.9869 | 0.6515 |
| 10x_mbQ20 | 0.98906335  | 302 | 158 | 34  | 3   | 0.9902 | 0.6565 |
| 10x_mbQ30 | 0.505833667 | 0   | 0   | 192 | 305 | 0      | NaN    |
| 10x_mbQ40 | 0.505833667 | 0   | 0   | 192 | 305 | 0      | NaN    |



**F-meas**

0.8658  
0.864  
0.864  
0.8632  
0.8628  
0.8627  
0.8627  
0.8627  
0.8627  
0.8627  
0.8619  
0.8619  
0.8614  
0.8614  
0.8614  
0.8614  
0.8614  
0.8614  
0.8614  
0.8614  
0.8614  
0.8614  
0.8614  
0.8614  
0.8614  
0.8614  
0.861  
0.8597  
0.8597  
0.8593  
0.8589  
0.8588  
0.8588  
0.8588  
0.8588  
0.858  
0.858  
0.8576  
0.8576  
0.8567  
0.8567  
0.8563  
0.8563  
0.8563  
0.8563  
0.8559  
0.8559  
0.8555  
0.8555  
0.8555  
0.8555  
0.8555

0.8555  
0.8554  
0.855  
0.8546  
0.8546  
0.8546  
0.8546  
0.8546  
0.8542  
0.8542  
0.8541  
0.8541  
0.8541  
0.8538  
0.8537  
0.8537  
0.8537  
0.8534  
0.8534  
0.8534  
0.8529  
0.8529  
0.8529  
0.8528  
0.8528  
0.8521  
0.8521  
0.8521  
0.8517  
0.8517  
0.8515  
0.8515  
0.8515  
0.8515  
0.8512  
0.8512  
0.851  
0.8507  
0.8507  
0.8502  
0.8502  
0.85  
0.85  
0.85  
0.85  
0.8498  
0.8498  
0.8496

0.8496  
0.8495  
0.8495  
0.8494  
0.8482  
0.8482  
0.8478  
0.8476  
0.8467  
0.8462  
0.8443  
0.844  
0.8421  
0.8419  
0.8412  
0.8412  
0.8402  
0.8399  
0.8397  
0.8392  
0.8389  
0.8386  
0.8376  
0.8376  
0.8374  
0.8354  
0.8344  
0.8341  
0.8325  
0.8318  
0.8305  
0.8275  
0.8255  
0.8211  
0.8165  
0.8147  
0.8145  
0.8135  
0.8032  
0.8032  
0.8032  
0.8019  
0.7981  
0.7921  
0.7883  
0.7816  
0.7776  
0.7738  
0.7676

0.7676  
0.7676  
0.7674  
0.7669  
0.7664  
0.7656  
0.764  
0.7638  
0.7612  
0.8293  
0.8293  
0.8293  
0.8293  
0.8293  
0.8293  
0.8293  
0.8293  
0.8293  
0.8293  
0.8263  
0.8252  
0.8263  
0.8235  
0.8224  
0.8235  
0.8202  
0.8219  
0.8223  
0.8148  
0.8277  
0.8312  
0.8285  
0.8246  
0.8223  
0.7969

NaN

NaN

NaN

NaN

NaN

0.8333  
0.8333  
0.8333  
0.8333  
0.8333  
0.8333  
0.8333  
0.8333  
0.8333

0.8333  
0.8286  
0.8286  
0.8284  
0.8267  
0.8247  
0.8259  
0.8226  
0.8242  
0.8229  
0.8193  
0.8284  
0.8307  
0.8297  
0.8258  
0.8235  
0.7951

NaN  
NaN  
NaN  
NaN  
NaN

0.8343  
0.8343  
0.8343  
0.8343  
0.8343  
0.8331  
0.8331  
0.8331  
0.8331  
0.8331  
0.8261  
0.8249  
0.8249  
0.8237  
0.8237  
0.8237  
0.8215  
0.8226  
0.8217  
0.8149  
0.8295  
0.8343  
0.8316  
0.8294  
0.8277  
0.7969

NaN

NaN  
NaN  
NaN  
NaN

0.8412  
0.8412  
0.8412  
0.8412  
0.8412  
0.8429  
0.8429  
0.8412  
0.8399  
0.8399  
0.8297  
0.8297  
0.8297  
0.8297  
0.8345  
0.8333  
0.8394  
0.8382  
0.8333  
0.8333  
0.8417  
0.8425  
0.8351  
0.8351  
0.8316  
0.7918

NaN  
NaN  
NaN  
NaN  
NaN

0.8437  
0.8437  
0.8437  
0.8437  
0.8437  
0.8437  
0.8437  
0.8424  
0.8412  
0.8412  
0.8333  
0.8373  
0.8373  
0.8376

0.8357  
0.8357  
0.8418  
0.8405  
0.8357  
0.8357  
0.8441  
0.8438  
0.8416  
0.8369  
0.8333  
0.7956

NaN

NaN

NaN

NaN

NaN

0.8279  
0.8279  
0.8291  
0.8314  
0.85  
0.8529  
0.8262  
0.8262  
0.8274  
0.8314  
0.85  
0.8529  
0.8279  
0.8297  
0.8326  
0.8162  
0.7508

NaN

0.8262  
0.8245  
0.8269  
0.8252  
0.8508  
0.8529  
0.8262  
0.8297  
0.8314  
0.821  
0.7638

NaN

0.7797  
0.7807

0.7807  
0.7878  
0.825  
0.8343  
0.7827  
0.7827  
0.7837  
0.7915  
0.825  
0.8343  
0.7807  
0.7827  
0.7869  
0.7814

NaN

NaN

0.7807  
0.7807  
0.7828  
0.7897  
0.8191  
0.8248  
0.7807  
0.7827  
0.7849  
0.7895

NaN

NaN
